# Supplementary material for: Measurement Properties of Existing Patient-Reported Outcome Measures on Medication Adherence: Systematic Review
Source: J Med Internet Res. 2020 Oct 9;22(10):e19179. doi: 10.2196/19179 (PMC7584986; doi:10.2196/19179)
Supplement: Multimedia Appendix 3 [file jmir_v22i10e19179_app3.docx]

**Supplementary Table 3**. Assessment of psychometric properties of PROMs.

|  |  | **Methodological quality of studies/ quality of measurement properties of PROM** | | | | | | | | | |
| --- | --- | --- | --- | --- | --- | --- | --- | --- | --- | --- | --- |
| **PROM** | **Reference** | **PROM development** | **Content validity** | **Structural validity** | **Internal consistency** | **Cross-cultural validity\ Measurement invariance** | **Reliability** | **Measurement error** | **Criterion validity** | **Hypotheses testing for construct validity** | **Responsiveness** |
| AAAQ | Schatz et al., 2013 53 | 0 | ?/adequate | ?/adequate | -/doubtful | 0 | 0 | 0 | 0 | -/adequate | +/adequate |
| AACTG | Buscher et al., 201154 | 0 | 0 | 0 | 0 | 0 | 0 | 0 | 0 | +/adequate | 0 |
| AACTG b | Gonzalez et al., 2013 55 | 0 | 0 | 0 | 0 | 0 | 0 | 0 | 0 | -/doubtful | 0 |
| AACTG b | Kalichman et al., 2007 56 | 0 | 0 | 0 | 0 | 0 | 0 | 0 | 0 | +/adequate | 0 |
| AACTG b | Reynolds et al., 2007 57 | 0 | 0 | ?/adequate | +/very good | 0 | 0 | 0 | 0 | +/adequate | 0 |
| AACTG b | Simoni et al., 201458 | 0 | 0 | 0 | 0 | 0 | 0 | 0 | 0 | ?/doubtful | 0 |
| AACTG b | Smith et al., 2007 59 | 0 | 0 | 0 | 0 | 0 | 0 | 0 | 0 | ?/doubtful | 0 |
| AACTG b | van der Boogaard et al., 2011 60 | 0 | 0 | 0 | 0 | 0 | 0 | 0 | 0 | 0 | +/doubtful |
| AACTG b | Chesney et al., 2000 61 | 0 | ?/inadequate | ?/inadequate | 0 | 0 | 0 | 0 | 0 | +/doubtful | 0 |
| AAS | Gabriel et al., 2010 62 | inadequate | ?/adequate | 0 | -/inadequate | 0 | 0 | 0 | 0 | -/adequate | 0 |
| ABQ | Müller et al., 2015 63 | inadequate | 0 | ?/adequate | +/very good | 0 | 0 | 0 | 0 | -/adequate | 0 |
| ABQ-HIVb | Mueller et al., 2018 64 | 0 | 0 | 0 | +/very good | 0 | 0 | 0 | 0 | +/very good | +/very good |
| Adherence tool for CML | Daouphars et al., 2013 65 | inadequate | 0 | 0 | -/very good | 0 | 0 | 0 | 0 | -/inadequate | -/doubtful |
| ADEOS-12 | Breuil et al., 2012 66 | 0 | 0 | 0 | 0 | 0 | 0 | 0 | 0 | +/very good | +/very good |
| AMBAS | Martins et al., 2019 67 | inadequate | +/doubtful | -/adequate | +/very good | 0 | 0 | 0 | 0 | +/adequate | 0 |
| APRQ | Ayiesah et al., 2009 68 | doubtful | +/doubtful | ?/adequate | +/inadequate | 0 | 0 | 0 | 0 | 0 | 0 |
| ARMS | Kripalani et al., 2017 69 | doubtful | +/doubtful | ?/adequate | +/very good | 0 | ?/doubtful | 0 | 0 | +/adequate | 0 |
| ARMS-7 | Gokdogan et al., 2009 70 | 0 | ?/doubtful | -/very good | +/very good | 0 | +/adequate | 0 | 0 | 0 | 0 |
| ASK-12 | Matza et al., 2017 71 | 0 | 0 | ?/adequate | +/very good | 0 | +/adequate | 0 | 0 | +/very good | 0 |
| ASK-20 | Atsuta et al., 2008 72 | 0 | 0 | 0 | +/inadequate | 0 | 0 | 0 | 0 | +/adequate | 0 |
| ASK-20 | Hahn et al., 2008 73 | adequate | +/adequate | ?/adequate | +/inadequate | 0 | 0 | 0 | 0 | +/adequate | -/adequate |
| ASK-20 | Matza et al., 2008 74 | 0 | 0 | 0 | +/inadequate | 0 | +/adequate | 0 | 0 | -/very good | 0 |
| ASRQ | Zeller et al, 200875 | 0 | +/doubtful | 0 | 0 | 0 | -/inadequate | 0 | 0 | 0 | -/adequate |
| Attitudes to mesalamine questionnaire | Moss et al., 2014 76 | inadequate | 0 | 0 | +/inadequate | 0 | 0 | 0 | 0 | +/very good | +/very good |
| *Axelsson et al*c | Axelsson et al., 2016 77 | inadequate | 0 | ?/adequate | +/very good | 0 | 0 | 0 | 0 | +/doubtful | 0 |
| BAASIS | Marsicano Ede et al., 2013 78 | 0 | +/adequate | ?/adequate | +/inadequate | a | +/very good | 0 | 0 | +/adequate | 0 |
| BEMIB | Dolder et al., 2004 79 | inadequate | ?/doubtful | ?/adequate | -/inadequate | 0 | ?/doubtful | 0 | 0 | -/inadequate | +/adequate |
| BERMA | McDonald-Miszczak et al., 2014 80 | doubtful | ?/inadequate | ?/inadequate | +/doubtful | 0 | 0 | 0 | 0 | +/doubtful | 0 |
| BMAS | Chui et al., 2018 81 | inadequate | 0 | ?/adequate | -/inadequate | 0 | +/adequate | 0 | 0 | +/adequate | 0 |
| BMCS | Bennett et al., 1997 82 | inadequate | +/doubtful | ?/adequate | +/very good | 0 | 0 | 0 | 0 | 0 | 0 |
| BMQb | Sriwarakorn et al., 2010 83 | 0 | ?/doubtful | 0 | 0 | 0 | +/adequate | 0 | 0 | 0 | +/doubtful |
| BMQb | Svarstad et al.,1999 84 | inadequate | 0 | 0 | 0 | 0 | 0 | 0 | 0 | +/adequate | +/adequate |
| BMQb | van den Boogaard et al., 2011 60 | 0 | 0 | 0 | 0 | 0 | 0 | 0 | 0 | 0 | -/doubtful |
| BMQb | Choo et al., 1999 85 | 0 | 0 | 0 | 0 | 0 | 0 | 0 | 0 | +/adequate | 0 |
| CASE adherence index | Kerr et al., 2012 86 | 0 | 0 | 0 | 0 | a | ?/inadequate | 0 | 0 | +/adequate | -/adequate |
| CASE adherence index | Mannheimer et al., 2006 87 | 0 | 0 | 0 | 0 | 0 | 0 | 0 | 0 | +/inadequate | +/inadequate |
| CDCI | Kyngäs et al., 2000 88 | very good | +/very good | ?/adequate | +/very good | a | 0 | 0 | 0 | +/inadequate | 0 |
| CDCI-asthmab | Wales et al., 2011 89 | 0 | 0 | ?/adequate | -/very good | 0 | 0 | 0 | 0 | -/very good | 0 |
| CDCI-diabetes b | Fernandes et al., 2011 90 | 0 | 0 | ?/adequate | +/very good | 0 | 0 | 0 | 0 | -/very good | 0 |
| CEAT-VIH | Dima et al., 2013 91 | 0 | +/adequate | 0 | +/inadequate | 0 | 0 | 0 | 0 | +/doubtful | 0 |
| *Chaiyachati et al*c | Chaiyachati et al., 2011 92 | 0 | 0 | 0 | 0 | 0 | 0 | 0 | 0 | 0 | -/doubtful |
| Compliance assessment | Kampman et al., 2001 93 | 0 | 0 | 0 | ?/inadequate | 0 | 0 | 0 | 0 | +/adequate | 0 |
| CoSMO self-report tool | Krousel-Wood et al., 2013 94 | inadequate | 0 | ?/inadequate | 0 | 0 | 0 | 0 | 0 | +/adequate | +/adequate |
| CQR | de Klerk et al., 199995 | adequate | +/adequate | 0 | +/inadequate | 0 | +/adequate | 0 | 0 | -/adequate | +/very good |
| CQR | Salt et al., 2012 96 | 0 | 0 | ?/adequate | +/very good | 0 | -/adequate | 0 | 0 | +/very good | 0 |
| CQR (KCQR) | Lee et al., 2011 97 | 0 | +/adequate | 0 | 0 | a | +/doubtful | 0 | 0 | -/doubtful | 0 |
| CQR-T (CQR) | Cinar et al., 2015 98 | 0 | +/adequate | ?/adequate | +/very good | 0 | -/adequate | 0 | 0 | +/adequate | 0 |
| CQR5 | Hughes et al., 2013 99 | 0 | 0 | +/very good | +/doubtful | 0 | 0 | 0 | 0 | +/adequate | -/adequate |
| *Da et al*c | Da et al., 2018 100 | 0 | 0 | 0 | ?/inadequate | 0 | 0 | 0 | 0 | -/doubtful | -/adequate |
| DAI | Hogan et al., 1983 101 | inadequate | 0 | 0 | +/inadequate | 0 | ?/inadequate | 0 | 0 | +/adequate | 0 |
| DAI-10 | Friemann et al., 2013 102 | 0 | 0 | 0 | +/doubtful | 0 | 0 | 0 | 0 | +/adequate | -/adequate |
| DAI-10 | Kikkert et al., 2011 103 | 0 | 0 | 0 | 0 | 0 | 0 | 0 | 0 | -/very good | -/adequate |
| DAI-9 | Stjernsward et al., 2013 104 | 0 | 0 | ?/adequate | 0 | 0 | -/inadequate | 0 | 0 | -/doubtful | 0 |
| DAMS | Garfield et al., 2012 105 | adequate | +/adequate | 0 | 0 | 0 | 0 | 0 | 0 | +/very good | 0 |
| *Demirtas et al*c | Demirtas et al., 2017 106 | adequate | +/adequate | ?/very good | +/very good | 0 | ?/doubtful | 0 | 0 | +/doubtful | 0 |
| DMARS-4 | Jacobsen et al., 2009 107 | 0 | ?/doubtful | 0 | +/very good | a | 0 | 0 | 0 | -/doubtful | 0 |
| DMQ | Mehta et al., 2015 108 | inadequate | ?/doubtful | 0 | +/very good | 0 | -/doubtful | 0 | 0 | +/adequate | 0 |
| DMSS | Sleath et al., 2016 109 | inadequate | 0 | 0 | +/inadequate | 0 | 0 | 0 | 0 | ?/doubtful | 0 |
| DMSS (CDMSS) | Zheng et al., 2018 110 | 0 | +/adequate | ?/adequate | +/inadequate | a | +/adequate | 0 | 0 | +/adequate | -/adequate |
| EBAS | Irvine et al., 1990 111 | 0 | 0 | 0 | +/very good | 0 | 0 | 0 | 0 | +/inadequate | 0 |
| EDSQ | Regnault et al., 2010 112 | 0 | 0 | ?/adequate | +/very good | 0 | 0 | 0 | 0 | ?/doubtful | 0 |
| EDSQ | Nordmann et al., 2007 113 | doubtful | +/doubtful | 0 | 0 | 0 | 0 | 0 | 0 | 0 | 0 |
| ESRD-AQ | Kim et al., 2010 114 | inadequate | +/adequate | 0 | 0 | 0 | +/inadequate | 0 | 0 | 0 | 0 |
| ESRD-AQ (PESRD-EQ) | Poveda et al., 2016 115 | 0 | +/adequate | 0 | 0 | a | +/doubtful | 0 | 0 | -/adequate | 0 |
| Every Visit Adherence Questionnaire | Fairley et al., 2005 116 | 0 | 0 | 0 | 0 | 0 | 0 | 0 | 0 | +/inadequate | 0 |
| Five-dimension adherence model | Kandrotaite et al., 2013 117 | inadequate | 0 | 0 | 0 | 0 | 0 | 0 | 0 | 0 | +/very good |
| *Fredericksen et al*c | Fredericksen et al., 2019 118 | doubtful | +/very good | 0 | 0 | 0 | +/very good | 0 | 0 | 0 | 0 |
| General adherence tendency measure | Zongo et al., 2016 119 | inadequate | 0 | 0 | 0 | 0 | 0 | 0 | 0 | -/adequate | -/adequate |
| GMAS | Naqvi et al., 2019 120 | 0 | 0 | +/very good | +/very good | 0 | -/adequate | 0 | 0 | +/adequate | +/adequate |
| GMAS | Naqvi et al., 2019 121 | 0 | ?/inadequate | +/very good | +/very good | a | +/adequate | 0 | 0 | +/adequate | ?/doubtful |
| GMAS | Naqvi et al., 2018 122 | doubtful | +/very good | +/very good | +/very good | 0 | -/adequate | 0 | 0 | +/doubtful | +/doubtful |
| *Godin et al*c | Godin et al., 2003 123 | doubtful | ?/doubtful | 0 | 0 | 0 | 0 | 0 | 0 | -/doubtful | +/doubtful |
| *Godin et al* b c | Zongo et al., 2016 119 | 0 | 0 | 0 | 0 | 0 | 0 | 0 | 0 | -/adequate | -/adequate |
| GTCAT | Mansberger et al., 2013 124 | inadequate | ?/adequate | ?/doubtful | -/very good | 0 | ?/inadequate | 0 | 0 | +/very good | 0 |
| GTCAT (reduced) | Abe et al., 2018 125 | 0 | ?/adequate | -/doubtful | -/very good | a | +/adequate | 0 | 0 | 0 | 0 |
| GTCAT (reduced) | Barker et al., 2019 126 | 0 | 0 | ?/adequate | -/very good | 0 | 0 | 0 | 0 | -/adequate | 0 |
| Hill Bone Scale (HBMA-K) | Song et al., 2011 127 | 0 | ?/doubtful | ?/adequate | +/very good | a | 0 | 0 | 0 | +/very good | 0 |
| Hill-Bone Scale | Kim et al., 2000 18 | adequate | +/adequate | ?/adequate | +/very good | 0 | 0 | 0 | 0 | -/very good | 0 |
| Hill-Bone Scale | Koschack et al., 2010 128 | 0 | 0 | ?/adequate | +/adequate | a | 0 | 0 | 0 | -/doubtful | 0 |
| Hill-Bone Scale | Krousel-Wood et al., 2005 129 | 0 | 0 | ?/adequate | -/very good | 0 | 0 | 0 | 0 | 0 | 0 |
| Hill-Bone Scale | Nogueira-Silva et al., 2016 130 | 0 | +/very good | 0 | 0 | a | 0 | 0 | 0 | 0 | 0 |
| Hill-Bone Scale (modified) | Alsolami et al., 2013 131 | 0 | ?/doubtful | 0 | -/inadequate | a | 0 | 0 | 0 | 0 | 0 |
| HIV-IM | Nelsen et al., 2012 132 | doubtful | +/adequate | ?/adequate | +/very good | 0 | 0 | 0 | 0 | +/doubtful | 0 |
| HIV-SQUAD | Spire et al., 2009133 | inadequate | 0 | ?/adequate | +/doubtful | 0 | 0 | 0 | 0 | +/adequate | 0 |
| IADMAS | Mikhael et al., 2019 134 | doubtful | ?/doubtful | 0 | +/very good | a | ?/adequate | 0 | 0 | +/very good | +/adequate |
| IRT-30 | Wohl et al., 2018 135 | adequate | +/adequate | ?/adequate | 0 | 0 | 0 | 0 | 0 | ?/doubtful | +/adequate |
| ITAS | Jesus-Nunes et al., 2018 136 | 0 | 0 | ?/adequate | +/inadequate | a | 0 | 0 | 0 | +/adequate | 0 |
| ITAS | Wilks et al., 2010 137 | 0 | 0 | ?/adequate | +/inadequate | 0 | 0 | 0 | 0 | -/adequate | 0 |
| ITBS | Chisholm et al., 2005 138 | doubtful | +/adequate | ?/adequate | +/very good | 0 | 0 | 0 | 0 | +/very good | +/very good |
| *Kennedy et al*c | Kennedy et al., 2000 139 | doubtful | +/adequate | 0 | 0 | 0 | 0 | 0 | 0 | 0 | 0 |
| *Kerr et al*c | Kerr et al., 2008 140 | inadequate | 0 | 0 | 0 | 0 | 0 | 0 | 0 | -/inadequate | -/adequate |
| Lasso-10 | Wohl et al., 2018 135 | adequate | +/adequate | ?/adequate | 0 | 0 | 0 | 0 | 0 | ?/doubtful | +/adequate |
| Long-Term Medication Behaviour Self-Efficacy Scale | De Geest et al., 1994 141 | inadequate | ?/doubtful | 0 | 0 | 0 | 0 | 0 | 0 | 0 | 0 |
| M-DRAW | Lee et al., 2017 142 | 0 | 0 | 0 | +/inadequate | 0 | 0 | 0 | 0 | -/adequate | +/adequate |
| M-DRAW | Lee et al., 2017 143 | 0 | 0 | ?/doubtful | +/inadequate | 0 | 0 | 0 | 0 | -/adequate | +/adequate |
| MAQ | Sadakathulla et al., 2019 144 | inadequate | ?/doubtful | 0 | +/inadequate | a | +/adequate | 0 | 0 | 0 | 0 |
| MAR-Scale | Unni et al., 2015 145 | doubtful | ?/inadequate | ?/adequate | -/very good | 0 | -/inadequate | 0 | 0 | +/inadequate | 0 |
| MAR-Scale (revised) | Unni et al., 2014 146 | adequate | +/adequate | ?/adequate | +/very good | 0 | 0 | 0 | 0 | +/adequate | 0 |
| MAR-Scale (revised) | Unni et al., 2019 147 | 0 | 0 | 0 | +/very good | 0 | 0 | 0 | 0 | 0 | 0 |
| MARS | Fialko et al., 2008 148 | 0 | 0 | ?/adequate | -/doubtful | 0 | 0 | 0 | 0 | -/inadequate | 0 |
| MARS | Fond et al., 2017 149 | 0 | 0 | -/very good | -/very good | 0 | 0 | 0 | 0 | -/inadequate | 0 |
| MARS | Friemann et al., 2013 102 | 0 | 0 | 0 | -/doubtful | 0 | 0 | 0 | 0 | +/adequate | +/adequate |
| MARS | Kao et al., 2010 150 | 0 | +/doubtful | ?/adequate | +/very good | a | ?/inadequate | 0 | 0 | +/very good | 0 |
| MARS | Owie et al., 2018 151 | 0 | 0 | ?/doubtful | +/very good | 0 | 0 | 0 | 0 | -/very good | 0 |
| MARS | Sowunmi et al., 2019 152 | 0 | +/doubtful | ?/adequate | +/doubtful | 0 | 0 | 0 | 0 | -/very good | 0 |
| MARS | Thompson et al., 2000 153 | inadequate | 0 | ?/adequate | +/inadequate | 0 | ?/inadequate | 0 | 0 | +/very good | 0 |
| MARS | Zemmour et al., 2016 154 | 0 | ?/inadequate | +/very good | -/very good | a | 0 | 0 | 0 | -/adequate | 0 |
| MARS-10 (MARS-A) | Cohen et al., 2009 155 | 0 | ?/inadequate | ?/adequate | +/very good | a | 0 | 0 | 0 | +/adequate | +/adequate |
| MARS-5 | Alsous et al., 2017 156 | 0 | +/adequate | ?/adequate | +/very good | a | +/adequate | 0 | 0 | ?/inadequate | 0 |
| MARS-5 | Garcia-Marcos et al., 2016 157 | 0 | 0 | 0 | 0 | 0 | 0 | 0 | 0 | +/adequate | +/adequate |
| MARS-5 | Jonsdottir et al., 2010 158 | 0 | 0 | 0 | 0 | 0 | 0 | 0 | 0 | +/adequate | 0 |
| MARS-5 | Lee et al., 2019 159 | 0 | 0 | +/very good | +/very good | 0 | 0 | 0 | 0 | -/inadequate | 0 |
| MARS-5 | Lin et al., 2018 160 | 0 | 0 | ?/very good | +/inadequate | 0 | 0 | 0 | 0 | +/very good | 0 |
| MARS-5 | Tommelein et al., 2014 161 | 0 | 0 | 0 | +/very good | 0 | 0 | 0 | 0 | -/inadequate | -/inadequate |
| MARS-5 | van de Steeg et al., 2009 162 | 0 | 0 | 0 | 0 | 0 | 0 | 0 | 0 | 0 | -/adequate |
| MARS-5 (MARS-D) | Mahler et al., 2010 163 | 0 | +/adequate | 0 | -/inadequate | a | -/adequate | 0 | 0 | -/very good | 0 |
| MARS-9 (MARS-9RA) | Salt et al., 2012 96 | 0 | 0 | ?/adequate | +/very good | 0 | -/adequate | 0 | 0 | +/very good | 0 |
| MARS-9 (MARS-P9) | Sampaio et al., 2019164 | 0 | +/adequate | ?/adequate | +/very good | a | 0 | 0 | 0 | -/adequate | 0 |
| MASES | Ogedegbe et al., 2013 165 | inadequate | +/doubtful | 0 | +/very good | 0 | ?/inadequate | 0 | 0 | -/adequate | 0 |
| MASES | Saffari et al., 2015 166 | 0 | +/very good | ?/adequate | +/very good | a | -/doubtful | 0 | 0 | +/very good | 0 |
| MASES-R | Fernandez et al., 2008 166 | 0 | 0 | ?/adequate | +/inadequate | 0 | -/doubtful | 0 | 0 | -/adequate | 0 |
| MASRI | Andy et al., 2015 167 | 0 | 0 | 0 | 0 | 0 | 0 | 0 | 0 | +/very good | +/adequate |
| MASRI | Koneru et al., 2007 168 | 0 | 0 | 0 | +/very good | 0 | +/doubtful | 0 | 0 | +/very good | 0 |
| MASRI | Kosilov et al., 2018 169 | 0 | 0 | 0 | 0 | 0 | 0 | 0 | 0 | +/very good | +/very good |
| MASRI | Kosilov et al., 2017 170 | 0 | 0 | 0 | 0 | 0 | 0 | 0 | 0 | +/adequate | +/adequate |
| MASRI | Kosilov et al., 2017 171 | 0 | 0 | 0 | 0 | 0 | 0 | 0 | 0 | +/very good | +/very good |
| MASRI | Kosilov et al., 2017 172 | 0 | 0 | 0 | 0 | 0 | 0 | 0 | 0 | +/very good | +/very good |
| Medication adherence scale | Ueno et al., 2018 173 | inadequate | +/doubtful | -/very good | +/very good | 0 | 0 | 0 | 0 | -/adequate | 0 |
| Medication adherence survey | Battistella et al., 2016 174 | adequate | +/adequate | 0 | 0 | 0 | 0 | 0 | 0 | +/inadequate | 0 |
| MEDS | Athavale et al. 2019 175 | doubtful | ?/doubtful | +/very good | +/very good | 0 | 0 | 0 | 0 | +/inadequate | -/very good |
| MIS-A | Dima et al., 2017 176 | adequate | +/adequate | 0 | 0 | 0 | -/adequate | 0 | 0 | +/adequate | 0 |
| MMAS-4 | Cate et al., 2015 177 | 0 | 0 | 0 | 0 | 0 | -/inadequate | 0 | 0 | -/doubtful | 0 |
| MMAS-4 | Cohen et al., 2010 178 | 0 | 0 | 0 | 0 | 0 | 0 | 0 | 0 | -/inadequate | 0 |
| MMAS-4 | Guénette et al., 2005 179 | 0 | 0 | 0 | 0 | 0 | -/inadequate | 0 | 0 | -/doubtful | 0 |
| MMAS-4 | Morisky et al., 1986 180 | 0 | 0 | ?/adequate | -/very good | 0 | 0 | 0 | 0 | +/very good | -/very good |
| MMAS-4 | Salt et al., 2012 96 | 0 | 0 | ?/adequate | -/very good | 0 | +/adequate | 0 | 0 | +/very good | 0 |
| MMAS-4 | Shalansky et al., 2004 181 | 0 | 0 | 0 | -/adequate | 0 | 0 | 0 | 0 | +/adequate | -/doubtful |
| MMAS-4 | van de Steeg et al., 2009 162 | 0 | 0 | 0 | 0 | 0 | 0 | 0 | 0 | 0 | -/adequate |
| MMAS-4 | van den Boogaard, et al., 2011 60 | 0 | 0 | 0 | 0 | 0 | 0 | 0 | 0 | 0 | -/doubtful |
| MMAS-4 (asthma medication) b | Brooks et al., 1994 182 | 0 | 0 | 0 | -/very good | 0 | ?/inadequate | 0 | 0 | 0 | +/very good |
| MMAS-4 (inhaler) b | Brooks et al., 1994 182 | 0 | 0 | 0 | +/very good | 0 | ?/inadequate | 0 | 0 | 0 | +/very good |
| MMAS-4 (inhaler) b | Erickson et al., 2001 183 | 0 | 0 | 0 | +/inadequate | 0 | 0 | 0 | 0 | -/adequate | 0 |
| MMAS-4 (MAQ) | Kikkert et al., 2001 103 | 0 | 0 | 0 | 0 | 0 | 0 | 0 | 0 | +/very good | +/adequate |
| MMAS-4 (MGLS) | Kristina et al., 2019 184 | 0 | +/doubtful | 0 | -/very good | a | ?/adequate | 0 | 0 | +/very good | -/very good |
| MMAS-4 (MGLS) | Wang et al., 2012 185 | 0 | inadequate | ?/adequate | -/very good | a | 0 | 0 | 0 | 0 | 0 |
| MMAS-4 (Morisky Green Scale) | Koschack et al., 2010 128 | 0 | 0 | ?/adequate | -/adequate | a | 0 | 0 | 0 | -/doubtful | 0 |
| MMAS-4 (Morisky-Green Test) | Prado et al., 2007 186 | 0 | 0 | 0 | 0 | 0 | 0 | 0 | 0 | +/doubtful | -/doubtful |
| MMAS-4 (SR-4) | Zongo et al.,2016 119 | 0 | 0 | 0 | 0 | 0 | 0 | 0 | 0 | -/adequate | -/adequate |
| MMAS-4 (SRMTS) | Jerant et al., 2008 187 | 0 | 0 | 0 | -/inadequate | 0 | 0 | 0 | 0 | -/doubtful | 0 |
| MMAS-7 | Fahey et al., 2006 188 | 0 | 0 | 0 | 0 | a | 0 | 0 | 0 | +/adequate | 0 |
| MMAS-8 | Ali et al.,2016 189 | 0 | 0 | 0 | +/inadequate | 0 | 0 | 0 | 0 | -/very good | 0 |
| MMAS-8 | Ambarish et al., 2013 190 | 0 | 0 | 0 | -/doubtful | 0 | 0 | 0 | 0 | 0 | 0 |
| MMAS-8 | Ashur et al., 2015 191 | 0 | 0 | 0 | +/doubtful | 0 | ?/inadequate | 0 | 0 | +/very good | 0 |
| MMAS-8 | De Las Cuevas et al., 2015 192 | 0 | 0 | -/very good | +/doubtful | 0 | 0 | 0 | 0 | +/doubtful | 0 |
| MMAS-8 | de Oliveira et al., 2014 193 | 0 | +/adequate | 0 | -/very good | 0 | ?/adequate | 0 | 0 | +/adequate | +/adequate |
| MMAS-8 | Dibonaventura et al., 2014 194 | 0 | 0 | ?/very good | -/very good | 0 | 0 | 0 | 0 | +/adequate | 0 |
| MMAS-8 | Fabbrini et al., 2013 195 | 0 | +/very good | 0 | 0 | 0 | 0 | 0 | 0 | +/doubtful | 0 |
| MMAS-8 | George et al., 2006 196 | 0 | 0 | 0 | 0 | 0 | 0 | 0 | 0 | -/doubtful | 0 |
| MMAS-8 | Jankowska-Polanska et al., 2014 197 | 0 | ?/doubtful | ?/doubtful | +/very good | a | -/doubtful | 0 | 0 | -/very good | 0 |
| MMAS-8 | Kim et al., 2012 198 | 0 | ?/doubtful | -/very good | -/inadequate | a | +/adequate | 0 | 0 | +/very good | -/very good |
| MMAS-8 | Korb-Savoldelli et al., 2013 199 | 0 | +/doubtful | ?/very good | -/very good | a | -/very good | 0 | 0 | 0 | 0 |
| MMAS-8 | Lee et al., 2008 200 | 0 | +/adequate | ?/adequate | -/very good | a | +/doubtful | 0 | 0 | +/very good | -/very good |
| MMAS-8 | Morisky et al., 2009 201 | 0 | 0 | +/very good | +/very good | 0 | 0 | 0 | 0 | +/very good | -/very good |
| MMAS-8 | Nakhaeizadeh et al., 2019 202 | 0 | +/doubtful | +/very good | +/inadequate | a | +/adequate | 0 | 0 | +/adequate | 0 |
| MMAS-8 | Sakthong et al., 2009 203 | 0 | +/adequate | ?/adequate | -/inadequate | a | +/doubtful | 0 | 0 | +/very good | -/doubtful |
| MMAS-8 | Shilbayeh et al., 2018 204 | 0 | 0 | 0 | -/adequate | 0 | 0 | 0 | 0 | -/adequate | -/very good |
| MMAS-8 | Tan et al., 2016 205 | 0 | 0 | 0 | +/inadequate | 0 | +/adequate | 0 | 0 | -/inadequate | 0 |
| MMAS-8 | Wang et al., 2012 206 | 0 | 0 | +/very good | +/very good | 0 | 0 | 0 | 0 | -/doubtful | 0 |
| MMAS-8 | Zongo et al., 2016 119 | 0 | 0 | 0 | 0 | 0 | 0 | 0 | 0 | -/adequate | -/adequate |
| MMAS-8 | Zongo et al., 2016 207 | 0 | 0 | ?/adequate | -/inadequate | 0 | 0 | 0 | 0 | 0 | 0 |
| MMAS-8 | Muntner et al., 201151 | 0 | 0 | 0 | 0 | 0 | -/ very good | 0 | 0 | 0 | 0 |
| MMAS-8 (MIAS) | Osborn et al., 2016 208 | 0 | 0 | 0 | -/very good | 0 | 0 | 0 | 0 | +/adequate | 0 |
| MMAS-8 (MMAS-8D) | Arnet et al., 2015 209 | 0 | +/doubtful | ?/doubtful | -/very good | a | 0 | 0 | 0 | -/adequate | 0 |
| MMAS-8 (MMAS-K) | Shin et al., 2013 210 | 0 | +/doubtful | ?/adequate | +/very good | a | 0 | 0 | 0 | +/very good | ?/adequate |
| MMAS-8 (MMAS-U) | Okello et al., 2016 211 | 0 | +/adequate | ?/adequate | -/very good | a | -/adequate | 0 | 0 | 0 | 0 |
| MMAS-8 (OS-MMAS-8) | Reynolds et al., 2014 212 | 0 | 0 | -/very good | +/very good | 0 | +/adequate | 0 | 0 | +/very good | ?/doubtful |
| MMAS-8 (OS-MMAS) | Reynolds et al., 2012 213 | 0 | 0 | +/very good | +/very good | 0 | +/very good | 0 | 0 | +/very good | 0 |
| MMAS-9 | Wickersham et al., 2018 214 | 0 | 0 | +/very good | -/very good | 0 | ?/doubtful | 0 | 0 | -/adequate | 0 |
| MNPS | Athavale et al., 2017 215 | doubtful | ?/doubtful | +/very good | +/inadequate | 0 | 0 | 0 | 0 | +/doubtful | -/inadequate |
| MOS General Adherence Scale | Jerant et al., 2008 187 | 0 | 0 | 0 | +/inadequate | 0 | 0 | 0 | 0 | -/doubtful | 0 |
| MS-TAQ | Wicks et al., 2011 216 | doubtful | ?/doubtful | 0 | -/very good | 0 | 0 | 0 | 0 | +/very good | 0 |
| OEOMA | Resnick et al., 2003 217 | inadequate | 0 | -/very good | +/very good | 0 | 0 | 0 | 0 | ?/doubtful | 0 |
| OEOMA (OEOMA-C) | Qi et al., 2014 218 | 0 | +/adequate | +/very good | +/very good | a | 0 | 0 | 0 | -/adequate | 0 |
| PEDIA scale | Almeida-Brasil et al., 2019 219 | doubtful | +/doubtful | ?/adequate | ?/doubtful | a | -/doubtful | 0 | 0 | +/doubtful | 0 |
| Pictographic self-efficacy scale | Kalichman et al., 2005 220 | inadequate | +/adequate | 0 | -/very good | 0 | -/inadequate | 0 | 0 | -/adequate | 0 |
| POP | Friemann et al., 2013 102 | 0 | 0 | 0 | 0 | 0 | 0 | 0 | 0 | +/adequate | 0 |
| PPQ | Zschocke et al., 2014 221 | doubtful | +/doubtful | 0 | +/doubtful | 0 | 0 | 0 | 0 | 0 | 0 |
| ProMAS | Kleppe et al., 2005 222 | doubtful | ±/doubtful | -/very good | +/doubtful | 0 | 0 | 0 | 0 | 0 | 0 |
| PT/PP | Jerant et al., 2018 187 | 0 | 0 | 0 | ?/inadequate | 0 | -/inadequate | 0 | 0 | -/doubtful | 0 |
| PT/PP | Arnsten et al., 2001 223 | 0 | 0 | 0 | 0 | 0 | 0 | 0 | 0 | +/adequate | 0 |
| QATOP | Teixeira et al., 2007 224 | adequate | +/adequate | 0 | 0 | 0 | 0 | 0 | 0 | ?/inadequate | 0 |
| Question of Interest (Qis) | Walewski et al., 2004 225 | 0 | ?/doubtful | 0 | 0 | 0 | 0 | 0 | 0 | -/inadequate | -/inadequate |
| SCI | Lewin et al., 2009 226 | 0 | 0 | 0 | +/inadequate | 0 | -/adequate | 0 | 0 | +/very good | -/adequate |
| SCI | Mumtaz et al., 2016 227 | 0 | ?/doubtful | -/very good | +/very good | a | 0 | 0 | 0 | -/adequate | 0 |
| SCI-R | Jansà et al., 2013 228 | 0 | +/adequate | ?/adequate | +/very good | a | ?/inadequate | 0 | 0 | +/inadequate | +/inadequate |
| SCRAT | Alhomoud et al., 2016 229 | 0 | 0 | 0 | +/very good | 0 | 0 | 0 | 0 | +/very good | +/very good |
| SCRAT | Lubinga et al., 2011 230 | 0 | 0 | 0 | +/doubtful | 0 | 0 | 0 | 0 | +/inadequate | +/adequate |
| SDSCA | Cohen et al., 2010 178 | 0 | 0 | 0 | 0 | 0 | 0 | 0 | 0 | -/inadequate | 0 |
| SDSCA | Gonzalez et al., 2013 55 | 0 | 0 | 0 | 0 | 0 | 0 | 0 | 0 | +/doubtful | 0 |
| SEAMS | Pedrosa et al., 2016 231 | 0 | 0 | ?/adequate | +/very good | 0 | 0 | 0 | 0 | +/inadequate | 0 |
| SEAMS | Pedrosa et al., 2016 232 | 0 | +/adequate | 0 | +/very good | a | +/very good | 0 | 0 | +/very good | 0 |
| SEAMS | Risser et al., 2017 233 | adequate | +/adequate | ?/adequate | +/very good | 0 | ?/doubtful | 0 | 0 | -/adequate | 0 |
| Self-efficacy scale | Najimi et al., 2017 234 | inadequate | ?/adequate | ?/adequate | +/very good | 0 | 0 | 0 | 0 | ?/inadequate | 0 |
| Self-report measures of adherence | Blumberg et al., 2005 235 | 0 | 0 | 0 | 0 | 0 | ?/adequate | 0 | 0 | +/adequate | 0 |
| Self-report on adherence | Prado et al., 2007 186 | 0 | 0 | 0 | 0 | 0 | 0 | 0 | 0 | -/doubtful | +/doubtful |
| SEOMA (SEOMA-C) | Qi et al., 2014 218 | 0 | +/adequate | -/very good | +/very good | a | 0 | 0 | 0 | +/adequate | 0 |
| SEOMA | Resnick et al., 2003 217 | inadequate | 0 | -/very good | +/very good | 0 | 0 | 0 | 0 | ?/doubtful | +/doubtful |
| SERAD questionnaire | Munoz-Moreno, et al., 2007 236 | 0 | ?/inadequate | 0 | 0 | 0 | 0 | 0 | 0 | ?/inadequate | 0 |
| SICT | Rofail et al., 2009 237 | adequate | +/adequate | ?/adequate | +/very good | 0 | 0 | 0 | 0 | +/very good | 0 |
| *Sidorkiewicz et al*c | Sidorkiewicz et al., 2016 238 | adequate | +/adequate | 0 | 0 | 0 | -/adequate | 0 | 0 | +/doubtful | 0 |
| SMAQ | Knobel et al., 2002 239 | inadequate | ?/doubtful | 0 | +/doubtful | 0 | +/very good | 0 | 0 | +/adequate | 0 |
| SMAQ | Ortega et al., 2011 240 | 0 | 0 | 0 | 0 | 0 | +/doubtful | 0 | 0 | +/adequate | -/very good |
| SOC Questionnaire | Rathbun et al., 2007 241 | 0 | 0 | 0 | 0 | 0 | 0 | 0 | 0 | ?/inadequate | 0 |
| SOC Questionnaire | Willey et al., 2000 242 | inadequate | 0 | 0 | 0 | 0 | 0 | 0 | 0 | +/adequate | 0 |
| SPNS adherence survey | Julian et al., 2010 243 | 0 | 0 | 0 | +/inadequate | 0 | 0 | 0 | 0 | +/adequate | 0 |
| SRSIb | Buscher et al., 2011 54 | 0 | 0 | 0 | 0 | 0 | 0 | 0 | 0 | +/adequate | 0 |
| SRSIb | Feldman et al., 2013 244 | 0 | 0 | 0 | 0 | 0 | 0 | 0 | 0 | +/inadequate | +/doubtful |
| SRSIb | Gonzalez et al., 2013 55 | 0 | 0 | 0 | 0 | 0 | 0 | 0 | 0 | +/doubtful | 0 |
| SRSI | Lu et al., 2008 245 | 0 | 0 | 0 | 0 | 0 | 0 | 0 | 0 | -/inadequate | 0 |
| TAI | Gutiérrez-Pereyra et al., 2015 246 | adequate | ?/adequate | ?/adequate | +/inadequate | 0 | +/very good | 0 | 0 | -/doubtful | -/very good |
| *Tan et al*c | Tan et al., 2019 247 | doubtful | ?/doubtful | ?/adequate | +/very good | 0 | +/very good | 0 | 0 | +/adequate | 0 |
| TAS-P | Mancebo et al., 2008 248 | inadequate | 0 | 0 | 0 | 0 | +/very good | 0 | 0 | -/adequate | 0 |
| TASHP | He et al., 2016 249 | 0 | 0 | +/very good | +/very good | 0 | 0 | 0 | 0 | +/adequate | -/adequate |
| TTAQ | Zschocke et al., 2015 221 | doubtful | +/doubtful | 0 | +/doubtful | 0 | 0 | 0 | 0 | 0 | 0 |
| *Turcu-știolică et al*c | Turcu-știolică et al., 250 | doubtful | +/doubtful | 0 | -/inadequate | 0 | 0 | 0 | 0 | -/inadequate | 0 |
| VAS | Buscher et al., 2018 54 | 0 | 0 | 0 | 0 | 0 | 0 | 0 | 0 | +/adequate | 0 |
| VAS | Kalichman et al., 2011 56 | 0 | 0 | 0 | 0 | 0 | -/inadequate | 0 | 0 | +/adequate | 0 |
| VAS | Kerr et al., 2009 86 | 0 | 0 | 0 | 0 | 0 | 0 | 0 | 0 | +/adequate | 0 |
| VAS | Giordano et al., 2012 251 | 0 | 0 | 0 | 0 | 0 | 0 | 0 | 0 | +/inadequate | 0 |
| VERITAS-PRN | Duncan et al., 2010 252 | inadequate | ?//doubtful | 0 | +/very good | 0 | +/very good | 0 | 0 | +/inadequate | 0 |
| VERITAS-Pro | Duncan et al., 2010 253 | adequate | +/adequate | 0 | +/very good | 0 | ?/doubtful | 0 | 0 | +/adequate | 0 |
| *Voils et al* c | Liau et al., 2019 254 | 0 | +/very good | +/very good | -/very good | a | -/very good | 0 | 0 | +/very good | 0 |
| *Voils et al* c | Voils et al., 2012 15 | doubtful | +/doubtful | +/very good | +/very good | 0 | -/adequate | 0 | 0 | -/very good | 0 |
| *Voils et al* c(extent of nonadherence) | Blalock et al., 2019 255 | 0 | 0 | +/very good | +/very good | 0 | 0 | 0 | 0 | +/doubtful | +/adequate |
| *Voils et al* c(extent of nonadherence) | Cornelius et al., 2019 256 | 0 | ?/doubtful | 0 | 0 | a | 0 | 0 | 0 | +/adequate | -/adequate |
| *Vreeman et al*c | Vreeman et al., 2019 257 | 0 | 0 | 0 | 0 | 0 | 0 | 0 | 0 | -/doubtful | -/doubtful |
| *Vreeman et al*c | Vreeman et al., 2014 258 | very good | ?/very good | 0 | 0 | a | 0 | 0 | 0 | 0 | 0 |
| Web-Ad-Q Questionnaire | Vale et al., 2018 259 | doubtful | +/doubtful | 0 | 0 | 0 | +/inadequate | 0 | 0 | +/doubtful | 0 |
| *Wilson et al*c | Phillips et al., 2017 260 | 0 | 0 | 0 | +/very good | a | 0 | 0 | 0 | 0 | -/adequate |
| *Wilson et al*c | Wilson et al., 2014261 | adequate | +/adequate | 0 | +/inadequate | 0 | 0 | 0 | 0 | 0 | 0 |
| *Wilson et al*c | Wilson et al., 2016 262 | 0 | 0 | 0 | +/inadequate | 0 | 0 | 0 | 0 | +/inadequate | 0 |

a Only translation was done. Cross-cultural validation was not the aim of the study

b Study assessed selected item domain to assess its measurement property

c PROMs without proper names are labelled based on the last name of the first author who developed the instrument

**Legends**

+: Positive; -: Negative; ?: Indeterminate

0: Measurement property was not assessed by the study

**Abbreviations:**

AAAQ: Adult Asthma Adherence Questionnaire; AACTG: Adult AIDS Clinical Trials Group; AAS: Antidepressant Adherence Scale; ABQ: Adherence Barrier Questionnaire; ADEOS: Adherence Evaluation of Osteoporosis Treatment Questionnaire; AMBAS: Antipsychotic Medication Beliefs and Attitudes Scale; APRQ: Adherence to Pulmonary Rehabilitation Questionnaire; ARMS: Adherence to Refills and Medications Scale; ASK: Adherence Starts with Knowledge questionnaire; ASRQ: Adherence self-report questionnaire; BAASIS: Basel Assessment of Adherence to Immunosuppressive Medications Scale; BEMIB: Brief Evaluation of Medication Influences and Beliefs; BERMA: Beliefs Related to Medication Adherence; BMAS: Brief Medication Adherence Scale; BMCS: Beliefs about Medication Compliance Scale; BMQ: Brief Medication Questionnaire; CASE: Center for Adherence Support Evaluation; CDCI: Chronic Disease Compliance Instrument; CEAT-VIH: *Cuestionario para la Evaluacio´ n de la Adhesio´ n al Tratamiento Antirretroviral en Personas con Infeccio´ n por VIH y Sida’’*;CoSMO: Cohort Study of Medication Adherence Among Older Adults; CQR: Compliance Questionnaire on Rheumatology; DAI: Drug Attitude Inventory; DAMS: Diagnostic Adherence to Medication Scale; DMQ: Diabetes Management Questionnaire; DMSS: Diabetes Medication Self-efficacy Scale; DRAW: Drug Adherence Work-Up Tool; EBAS: Environmental Barriers to Adherence Scale; EDSQ: Eye-Drop Satisfaction Questionnaire; ESRD-AQ: End-Stage Renal Disease Adherence Questionnaire; GMAS: General Medicine Adherence Scale; GTCAT: Glaucoma Treatment Compliance Assessment Tool; HIV-IM: HIV Intention Measure; HIV-SQUAD: HIV Symptom Quality of Life Adherence Questionnaire; IADMAS: Iraqi Anti-Diabetic Medication Adherence Scale; IRT: Item Response Theory; ITAS: Immunosuppressant Therapy Adherence Scale; ITBS: Immunosuppressant Therapy Barrier Scale; Lasso- Least absolute shrinkage and selection operator; MAQ: Medication Adherence Questionnaire; MAR-Scale: Medication Adherence Reasons Scale MARS: Medication Adherence Rating Scale; MARS-5/9/10: 5/9/10-item Medication Adherence Report Scale; MASES: Medication Adherence Self-efficacy Scale; MASRI: Medication Adherence Self-Report Inventory; MEDS: Medication Adherence Estimation and Differentiation Scale; MIS-A: Medication Intake Survey-Asthma; MMAS: Morisky Medication Adherence Scale; MNPS: Medication Nonpersistence Scale; MOS: Medical Outcomes Study; MS-TAQ: Multiple Sclerosis Treatment Adherence Questionnaire; OEOMA: Outcome Expectations for Osteoporosis Medication Adherence Scale; PEDIA: Perceived Barriers to Antiretroviral Therapy Adherence Scale; POP: Patient Rating of Compliance Scale; PPQ: Patient Preference Questionnaire; ProMAS: Probabilistic Medication Adherence Scale: PT/PP: No. of pills taken/prescribed; QATOP: Questionnaire for Adherence with Topical Treatments in Psoriasis; SCI: Self-Care Inventory; SCRAT: Strathclyde Compliance Risk Assessment Tool; SDSCA: Summary of Diabetes Self-care Activities; SEAMS: Self-Efficacy for Appropriate Medication Adherence Scale; SEOMA: Self-Efficacy for Osteoporosis Medication Adherence Scale; SERAD: Self-Reported Adherence questionnaire; SICT: Satisfaction with iron chelation therapy; SMAQ: Simplified Medication Adherence Questionnaire; SOC: Stages of change model; SPNS: Special Projects of National Significance adherence tool; SRSI: Self-rating scale item; TAI: Test of the Adherence to Inhalers; TAS-P: Treatment Adherence Survey-Patient Version; TASHP: Therapeutic Adherence Scale for Hypertensive Patients; TTAQ: Topical Therapy Adherence Questionnaire; VAS: Visual analogue scale; VERITAS-PRN: Validated Hemophilia Regimen Treatment Adherence Scale – On-Demand; VERITAS-Pro: Validated Hemophilia Regimen Treatment Regimen Treatment Adherence Scale-Prophylaxis
